# Supplementary material
Source: publisher site journal article supplement (https://www.dovepress.com/article/439760)
Supplement: Supplementary file 1 [file get_supplementary_file.php]

**SUPPLEMENTARY MATERIAL**


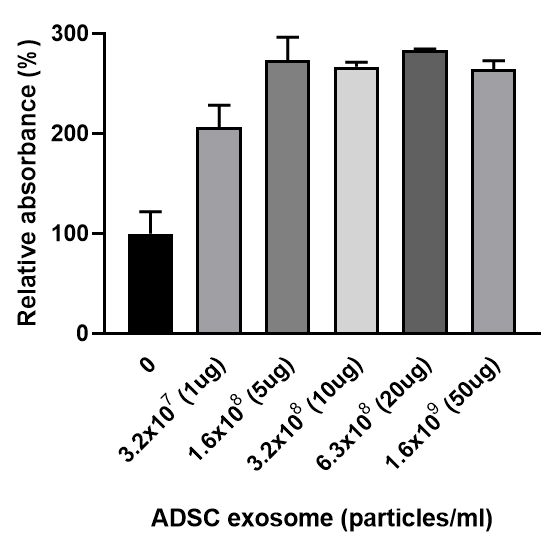


**Supplementary Figure 1. The efficacy of ADSC exosomes on the proliferation of human dermal fibroblasts.** Human dermal fibroblasts (Biosolution Ltd., Nowon, Seoul, Korea) were treated with exosomes by concentration during 48 h. After then, cells were treated with 0.5 mg/mL MTT (3-[4,5 dimethylthioazole-2-yl]-2,5-diphenyl tetrazolium bromide) (M2129; Sigma-Aldrich, St. Louis, MO, USA) reagent. The results were then measured at 570 nm using an ELISA reader (Versamax, Molecular device, San Jose, CA, USA). The results were expressed as sample/control(0)*100.

**Supplementary Table 1.**

**mRNA Primers Used for RT-qPCR**

| **Antibody name** | **TaqMan Assay ID** |
| --- | --- |
| *IL1B* | Hs1555410_m1 |
| *IL6* | Hs00174131_m1 |
| *TNFA* | Hs 00174128_m1 |
| *NOX2* | Hs00166163_m1 |
| *NOX4* | Hs00418356_m1 |
| *Nrf2* | Hs00975961_g1 |
| *GAPDH* | Hs 02758991_m1 |

**Supplementary Table 2**

**Antibodies used for western blot analyses and immunoprecipitation Antibody**

| **Antibody** | **Host** | **Dilution** | **Company** | **CaT.No** | **MW** |
| --- | --- | --- | --- | --- | --- |
| CD63 | Rabbit | 1:1000 | Abcam | ab134045 | 65 kDa |
| CD9 | Rabbit | 1:1000 | Abcam | ab236630 | 25 kDa |
| ATG5 | Rabbit | 1:1000 | Abcam | ab108327 | 45 kDa |
| P62 | Rabbit | 1:1000 | Abcam | ab155686 | 47 kDa |
| Beclin1 | Rabbit | 1:1000 | Abcam | NB500-249 | 50 kDa |
| LC3Bll | Rabbit | 1:1000 | Abcam | ab51520 | 15 kDa |
| P65 | Rabbit | 1:1000 | Abcam | ab16502 | 64 kDa |
| Phosphor-P65 | Rabbit | 1:1000 | Abcam | ab86299 | 60 kDa |
| P38 | Rabbit | 1:1000 | Abcam | ab31828 | 41 kDa |
| Phosphor-P38 | Rabbit | 1:1000 | Abcam | ab4822 | 38 kDa |
| GAPDH | Rabbit | 1:1000 | Abcam | ab9485 | 37 kDa |
